# Supplementary material
Source: publisher site journal article supplement (https://www.dovepress.com/article/348539)
Supplement: Supplementary file 1 [file get_supplementary_file.php]

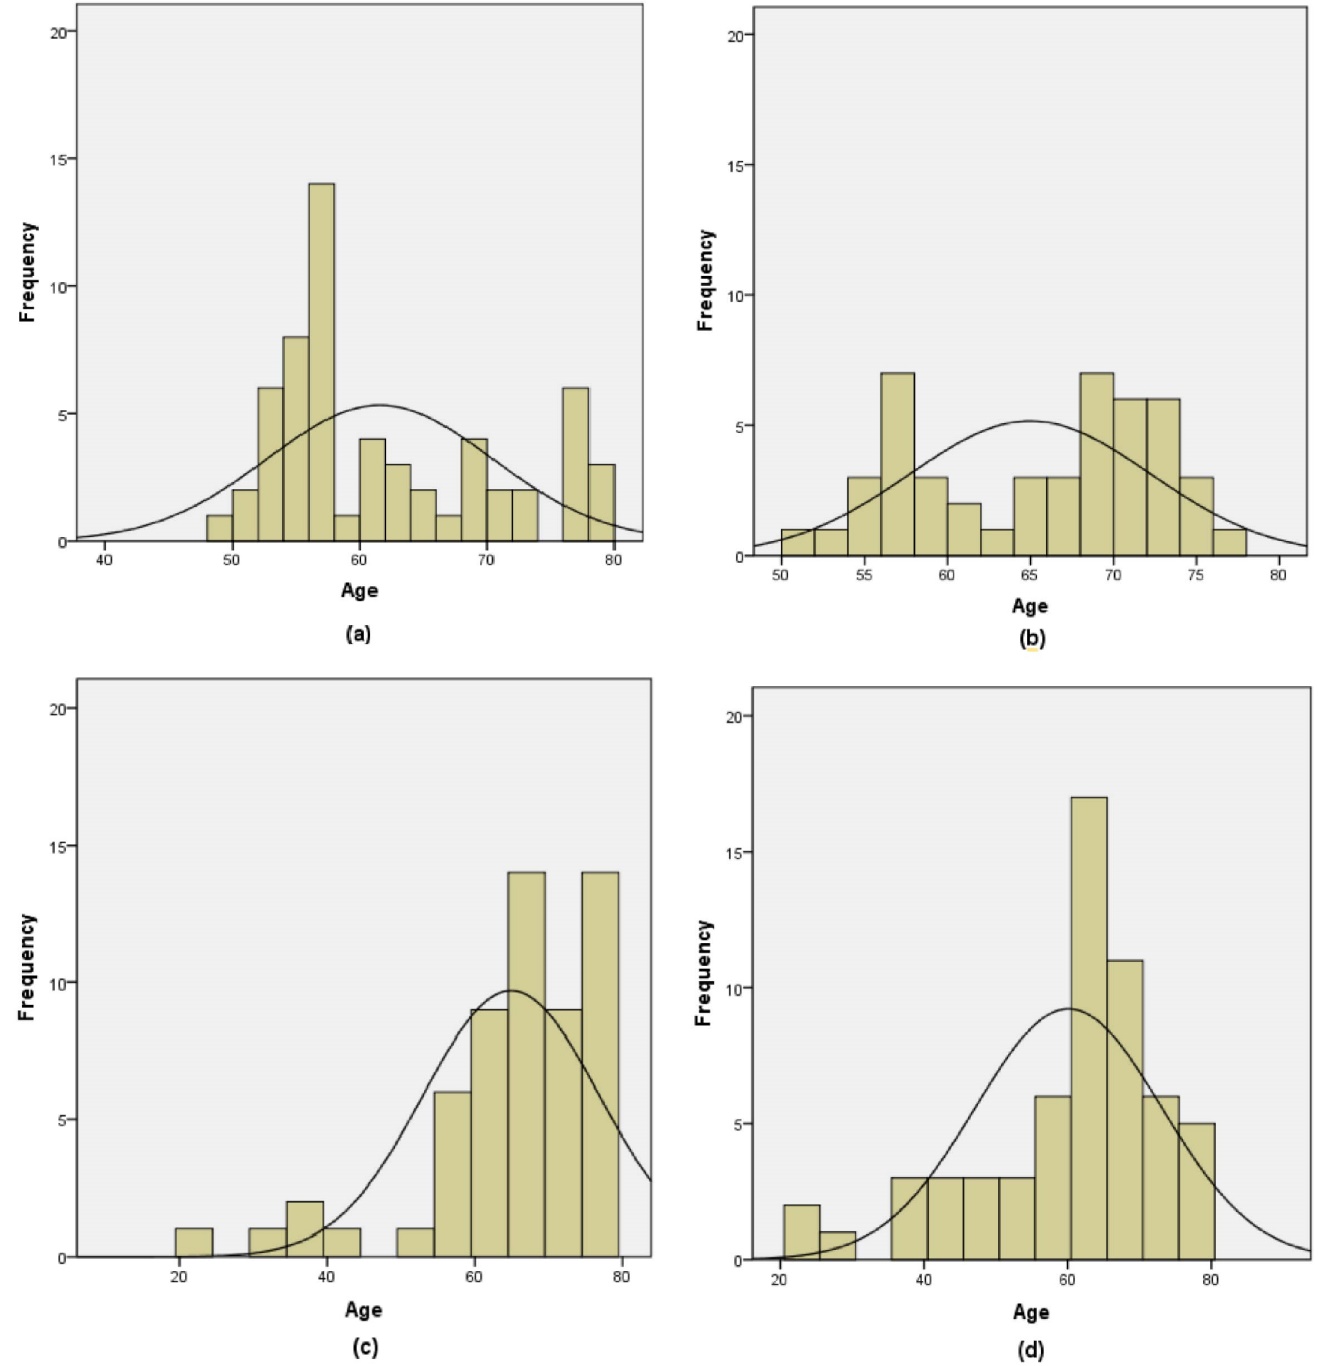
**Supplementary Figure 1 Age distribution of AMD group and control group.**

1. age distribution of men in the control group; (b) age distribution of women in the control group; (c) age distribution of men in the AMD group; (d) age distribution of women in the AMD group.
